# Supplementary material for: Long non-coding RNA-MIAT promotes neurovascular remodeling in the eye and brain
Source: PubMed Central journal article supplement (PMC5226539; doi:10.18632/oncotarget.10434), 2016-07-06
Supplement: oncotarget-07-49688-s001.pdf [file oncotarget-07-49688-s001.pdf]

# Long non-coding RNA-MIAT promotes neurovascular remodeling in the eye and brain

## Supplementary Materials

### Western blot

Cells or tissues were lysed in RIPA protein lysis buffer. Protein concentration was determined using bicinchoninic acid assay (Pierce). About 50  $\mu\text{g}$  protein was used for immunoprecipitation or was loaded per lane, subjected to SDS-PAGE, transferred onto PVDF membranes, and then blotted with specific antibody.

### Müller cell and endothelial cell or RGC co-culture

$1 \times 10^6$  endothelial cells or primary RGCs were seeded on 6-well plates coated with fibronectin. After 6 h, the non-adherent cells were removed and cell medium was replaced with DMEM/F12 containing 10% FBS. Transwell inserts (Millipore) were added to the wells and seeded with  $5 \times 10^5$  Müller cells. After the required treatment, the insert was removed, and cell function was determined.

### Viral transduction in mouse Hippocampus

Mice were anesthetized intraperitoneally with ketamine/xylazine (90 mg/10 mg/kg). Viral vectors were diluted with sterile PBS (pH 7.4) to achieve a titer of  $3 \times 10^9$ . MIAT shRNA or scrambled shRNA was injected bilaterally into the dentate gyrus region of the hippocampus using the coordinates:  $\pm 3.2$  mm medial/lateral,  $-2.7$  mm anterior/posterior,  $-2.7$  mm dorsal/ventral from the bregma. The preparation was injected with a speed of 0.5  $\mu\text{L}/\text{min}$  over a period of 4 min using a Hamilton 5- $\mu\text{L}$  syringe. The mice were allowed to recover in a heated chamber before waking.

### RNA extraction and real-time PCR

Total RNAs were extracted using TRIzol reagent (Invitrogen) and then reversely transcribed using PrimeScript RT reagent Kit (TaKaRa, Dalian, China). Real-time PCRs were performed using the PikoReal™ Real-Time PCR System (Thermo Scientific). The reaction mixture (20  $\mu\text{L}$ ) contained 10 ng cDNA template, 200 nM each of sense and antisense primers, and 10  $\mu\text{L}$  2  $\times$  SYBR-Green PCR Mix (TaKaRa, Dalian, China). Real-time PCRs were performed in duplicate for each sample.

### Hoechst staining

After the required treatment, cells were fixed with 4% formaldehyde for 15 min at room temperature, and then permeabilized using Triton-X 100 for 10 min. After three

times wash, these cells were stained with Hoechst 33342 (100  $\mu\text{g}/\text{ml}$ ) for 10 min, and then washed with PBS buffer. Stained nuclei were observed using an Olympus IX-73 microscope.

### MTT assay

Cell viability was detected using 3-(4, 5-dimethylthiazol-2-yl)-2, 5-diphenyl-tetrazolium-bromide assay (MTT). Briefly, cells were plated at a density of  $1 \times 10^4$  cells per well in 96-well plates. After the required treatment, they were incubated with MTT (0.5 mg/ml) at 37°C for 3 h. Finally, DMSO solution (100 mM) was added to dissolve formazan crystals. The absorbance was detected at 570 nm wavelength using a microplate reader (Molecular Devices).

### Mitochondrial membrane potential detection

The cells ( $2 \times 10^6$  cells/ml) were incubated with the fluorescent dye, JC-1 (Molecular Probes), at 37°C for 3 h to detect mitochondrial membrane potential ( $\Delta\psi\text{m}$ ). The fluorescence intensity was detected using a microplate reader (Molecular Devices) (excitation at 485 nm, emission spectra between 530–620 nm). An intact  $\Delta\psi\text{m}$  allows JC-1 having a delocalized positive charge, which shows red fluorescence, whereas  $\Delta\psi\text{m}$  collapse allows JC-1 dye to remain in the cytoplasm showing green fluorescence in apoptotic cells. Mitochondrial depolarization was expressed as the decrease in the red-to-green fluorescence intensity ratio.

### Luciferase assay

The 3'-untranslated regions (UTR) of VEGF was cloned into the downstream of the firefly luciferase gene in pGL3 vector (Promega). The 3'-UTR without miR-150-5p binding site was constructed to generate pGL3-VEGF mutant. For luciferase assays, cells were pre-plated in 24-well plates, and then transfected with either wild-type or mutant construct with and without miRNA mimic or negative control mimic. Luciferase activities were detected using a Dual Luciferase Reporter Assay System (Promega).

### Calcein-AM and propidium iodide (PI) double staining

Calcein-AM and PI double staining was used to detect live and dead cells. After the required treatment, cells were fixed with 4% formaldehyde for 15 min, and then stained using Calcein-AM solution (10  $\mu\text{mol}/\text{L}$ ) for 10 min. After

washing with PBS, these cells were stained with PI solution (10  $\mu\text{mol/L}$ ) for 10 min. The live cells were observed using a 490 nm excitation filter, whereas the dead cells were observed using a 545 nm excitation filter.

### **Transwell cell migration assay**

Endothelial cells were seeded onto the upper chamber of 12-well Transwell plates. Medium containing 10% FBS was placed in the lower chamber and served as a chemoattractant. After the required treatment, the cells on the upper surface of the filter were removed by gently wiping with a cotton swab after 24 h treatment. The migrated were fixed and stained with crystal violet.

### **Intravitreal injection**

The mice were anesthetized with 2% isoflurane, and a drop of 0.5% proparacaine was administered as a topical local anesthesia. A fine glass micropipette connected to a 10  $\mu\text{l}$  Hamilton glass syringe was inserted through the incision in the cornea and slid between the iris and the lens into the posterior chamber of the eye. Each eye received about 3  $\mu\text{l}$  adenovirus. Injections were administered slowly over approximately one minute and monitored with a stereo microscope.

### **Immunohistochemistry**

The eyes of diabetic mice were removed, fixed in 4% PFA at 4°C for 12 h. Eyes were then cryoprotected in 30% sucrose for 12 h, embedded in OCT medium. For immunohistochemistry, sections were permeabilised with 0.2% Triton-X for 30 min, and then blocked with 10% bovine serum albumin (BSA) for 1 h. Retinal sections were incubated with the primary antibody, including GFAP (1:200, Abcam), vimentin (1:200, Abcam), NeuN (1:100, Abcam), TUBB3(1:100, Abcam), calretinin (1:500, Chemicon), calbindin (1:200, Abcam), rhodopsin (1:1,000, Sigma), and protein kinase C $\alpha$  (PKC $\alpha$ , 1:200, Abcam), at 4°C for 24 h. The sections were washed with PBS, and then incubated with fluorophore-conjugated secondary antibodies (Invitrogen) at 4°C for 24 h. Brains were immersion-fixed in 4% PFA at 4°C for 24 h. After cryoprotection, the hemisphere was frozen in liquid nitrogen and cut in 20  $\mu\text{m}$  cryosections with an interval of 400  $\mu\text{m}$ , post-fixed in acetone, and incubated with the primary antibody at 4°C for 24 h followed by fluorophore-conjugated secondary antibodies. Vascular change was examined using the tight junction proteins, occluding (Abcam, 1:100) and zonula occludens-1 (ZO-1, Abcam, 1:100), and isolectin B4 (Abcam, 1:200). Neurodegenerative changes were shown by the immunodetection of SMI-311 (1:100, Abcam), NeuN (1:100, Abcam), GFAP (1:100, Abcam), and CD11b/c (1:100, Abcam).

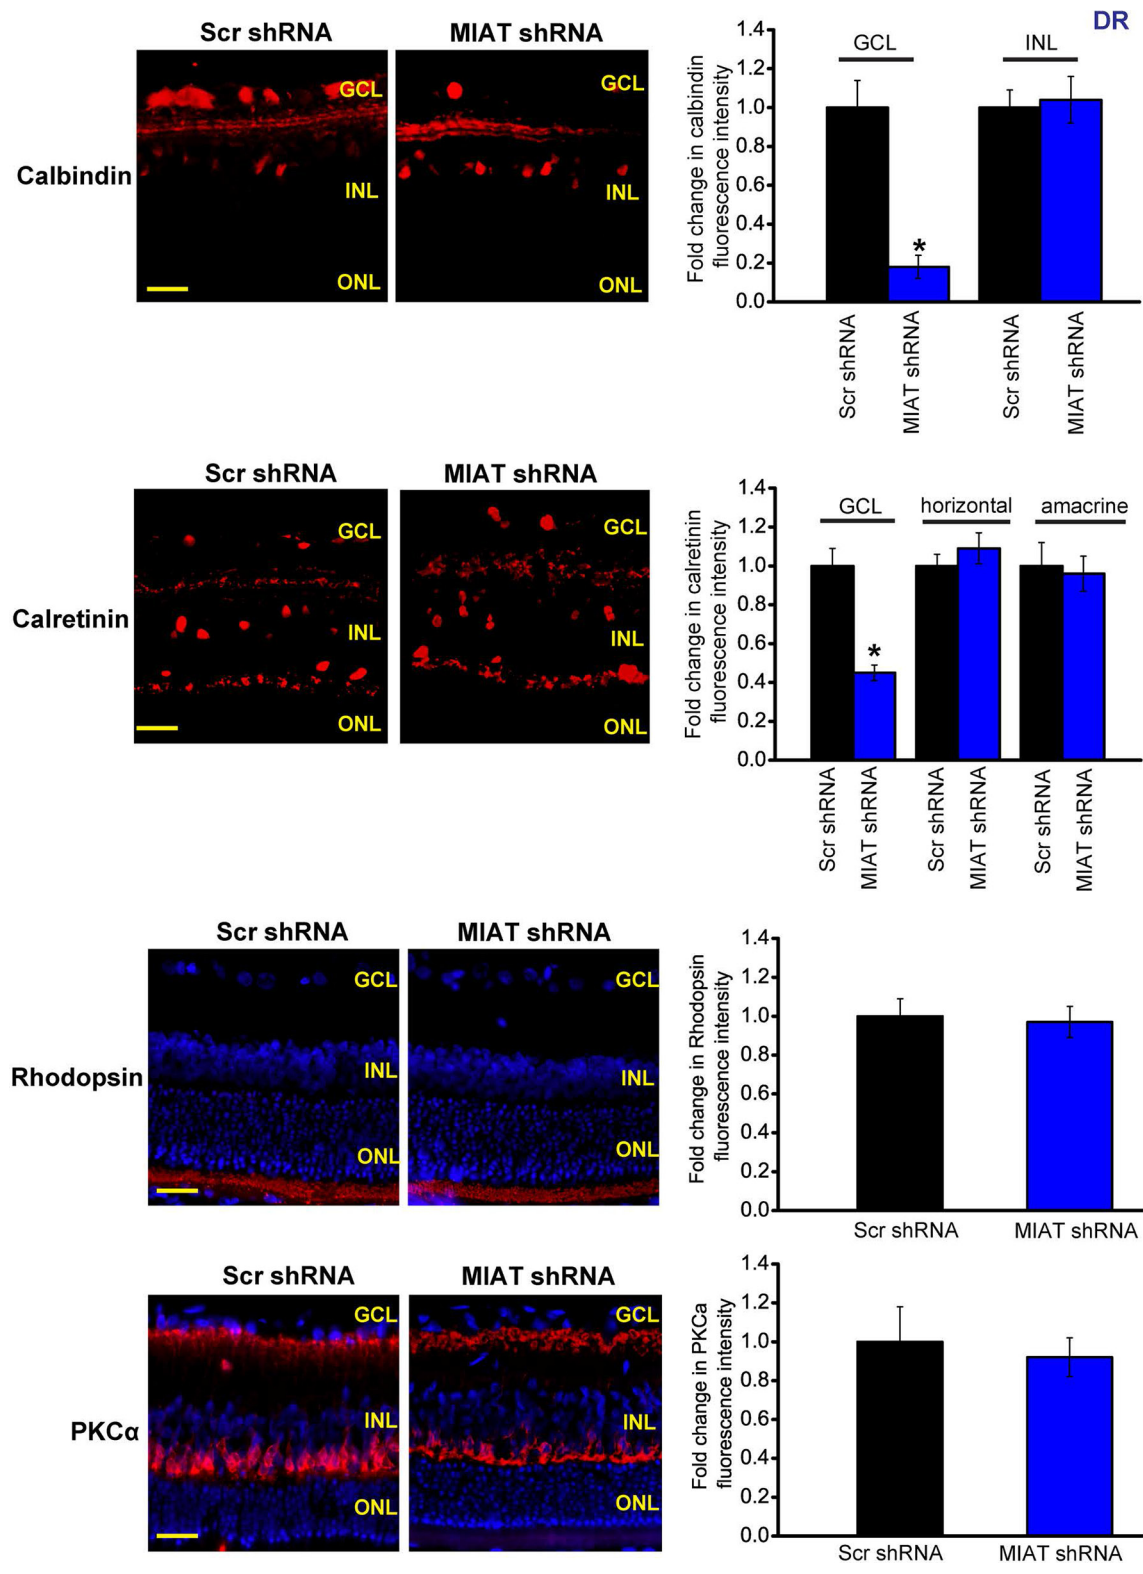

**Supplementary Figure S1: MIAT knockdown does not affect retinal horizontal cells, amacrine cells, photoreceptors, and bipolar cells in diabetic retinas.** Diabetic retinal slices were immunolabeled for protein markers, including rhodopsin, PKC $\alpha$ , calbindin, and calretinin. Quantitative analysis showed that MIAT knockdown did not affect retinal horizontal cells, amacrine cells, photoreceptors, and bipolar cells. Scale bar, 100  $\mu$ m. GCL, ganglion cell layer; INL, inner nuclear layer; RGC, retinal ganglion cell; ONL, outer nuclear layer ( $n = 6$  animals per group). \* $P < 0.05$ . All data were from three independent experiments.

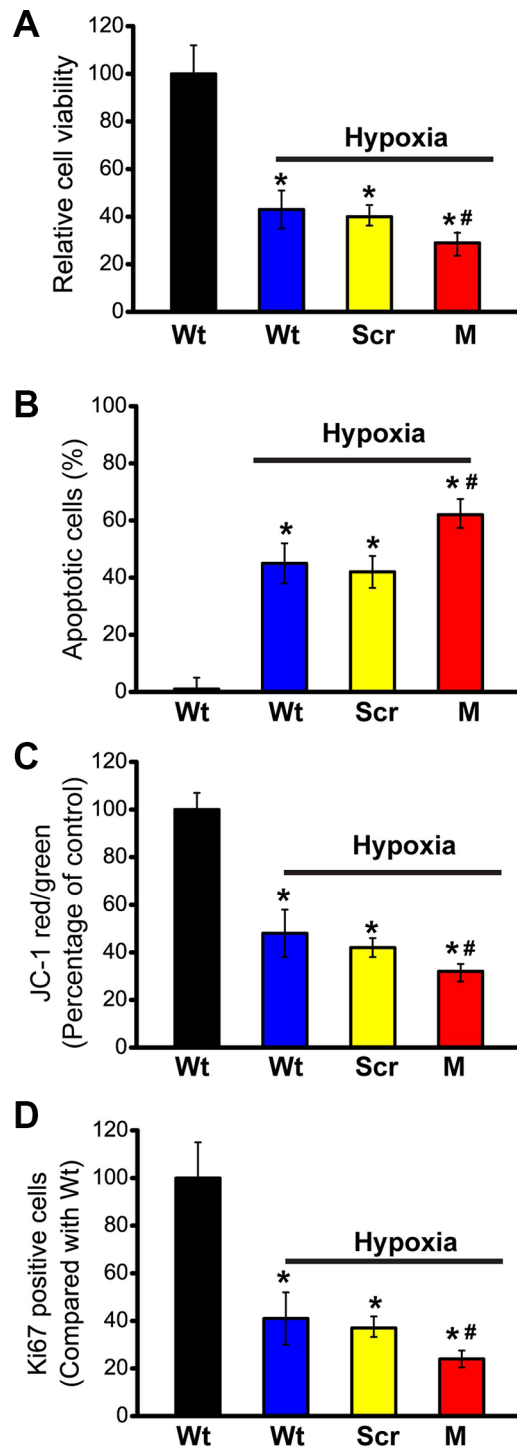

**Supplementary Figure S2: MIAT regulates Müller cell function under hypoxia condition.** (A) Müller cells were transfected with scrambled siRNA (Scr), MIAT siRNA, or left untreated, and then exposed to hypoxia (CoCl<sub>2</sub>, 200  $\mu$ m) for 48 h. Cell viability was detected using MTT method ( $n = 4$ ). (B) Apoptotic cells were detected using Hoechst staining and quantitated ( $n = 4$ ). (C) Müller cells were incubated with JC-1 probe at 37°C for 30 min, centrifuged, washed, transferred to a 96-well plate (100 000 cells per well), and assayed using a fluorescence plate reader ( $n = 4$ ). (D) Ki67 immunofluorescence staining and quantitative analysis revealed that MIAT knockdown reduced Müller cell proliferation ( $n = 4$ ).

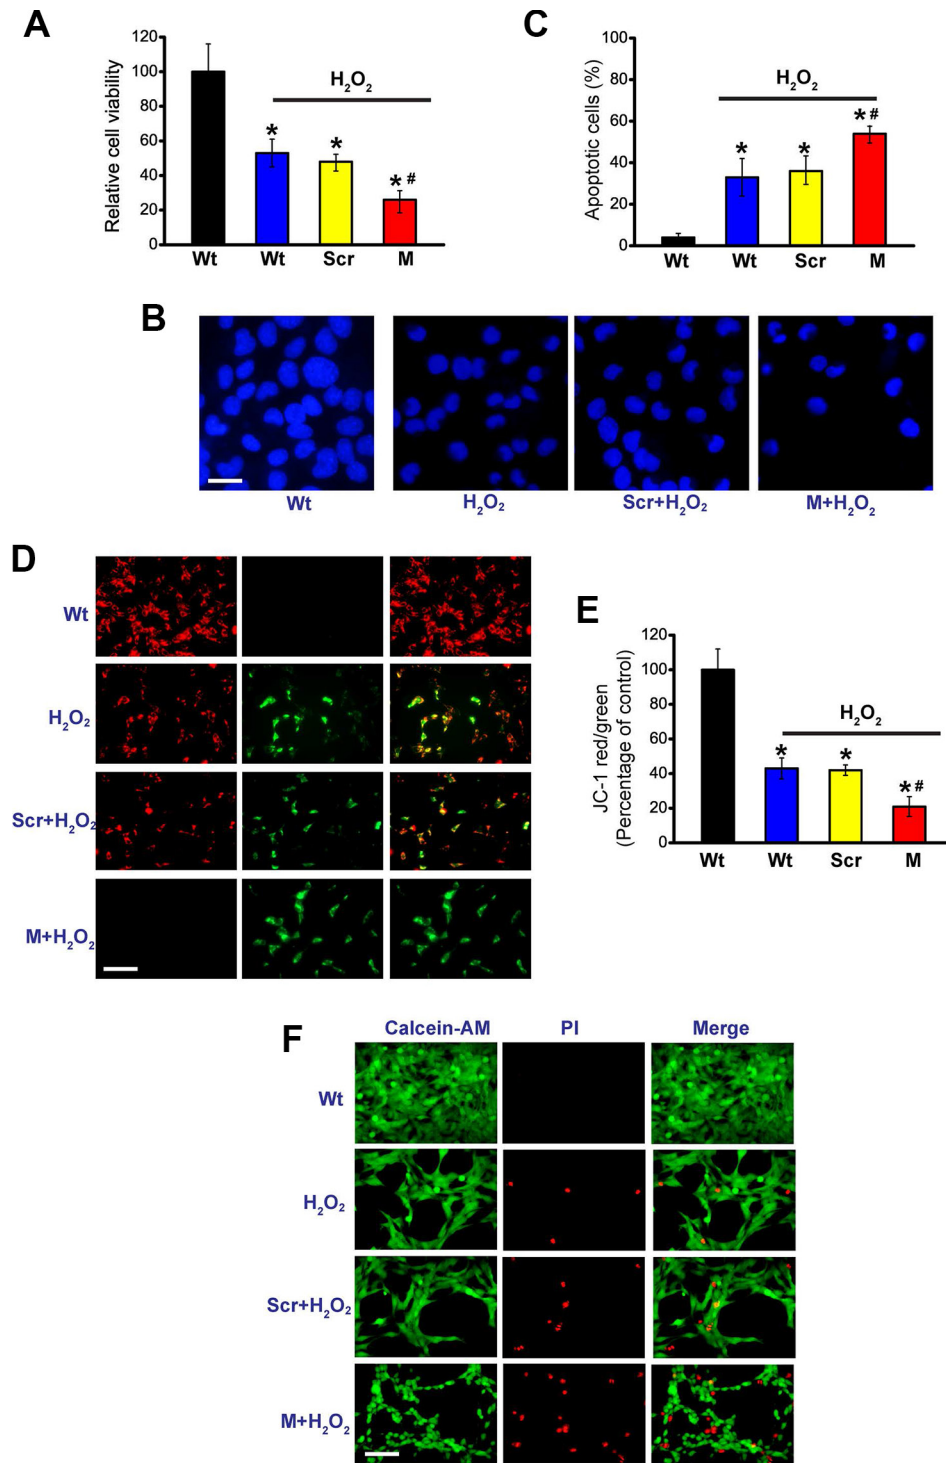

**Supplementary Figure S3: MIAT regulates RGC function upon oxidative stress.** (A) RGCs were transfected with scrambled siRNA (Scr), MIAT siRNA, or left untreated, and then exposed to H<sub>2</sub>O<sub>2</sub> (50  $\mu$ m) for 48 h. Cell viability was detected using MTT method ( $n = 4$ ). (B, C) Apoptotic cells were detected using Hoechst staining and quantitated ( $n = 4$ ). Scale bar, 20  $\mu$ m. (D, E) RGCs were incubated with JC-1 probe at 37  $^{\circ}$ C for 30 min, centrifuged, washed, transferred to a 96-well plate (100 000 cells per well), observed using a fluorescence microscope (D,  $n=4$ ), and assayed using a fluorescence plate reader (E,  $n = 4$ ). Scale bar, 50  $\mu$ m. (F) Dead or dying cells were analyzed using calcein-AM/PI staining. Green: live cells, Red: dead or dying cell ( $n = 4$ ). Scale bar, 50  $\mu$ m.

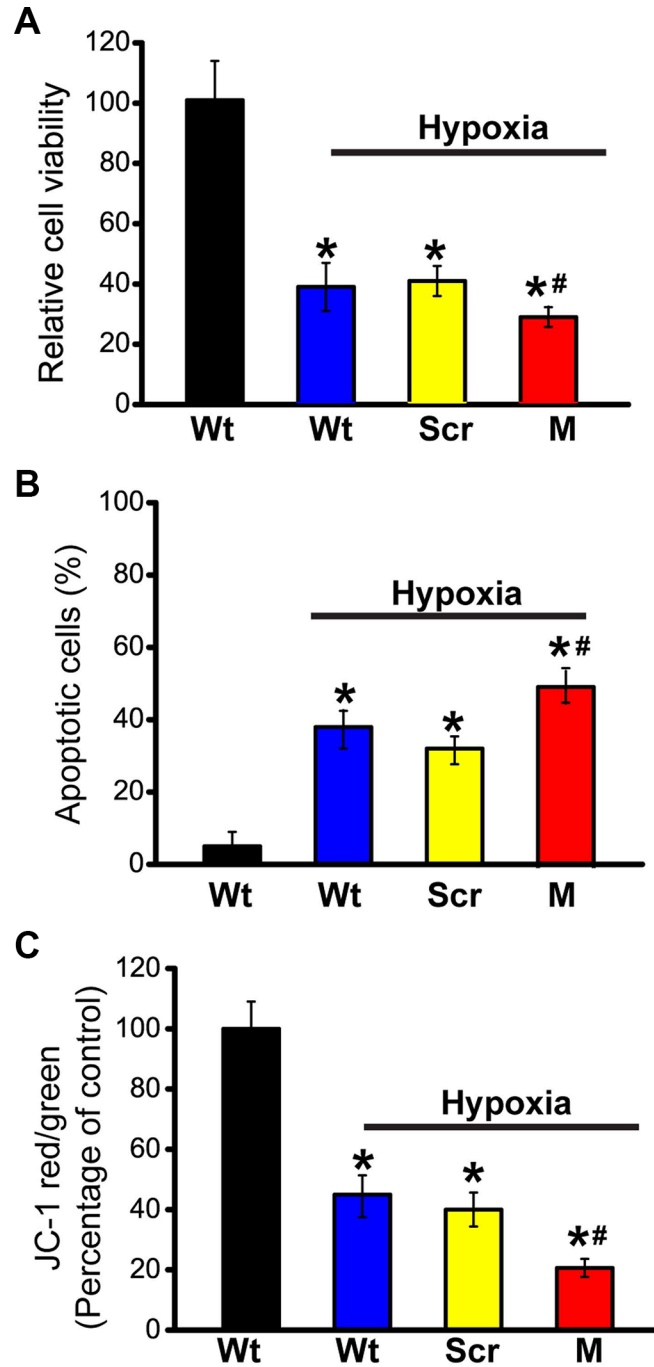

**Supplementary Figure S4: MIAT regulates RGC function upon hypoxia stress.** (A) RGCs were transfected with scrambled siRNA (Scr), MIAT siRNA, or left untreated, and then exposed to hypoxia (CoCl<sub>2</sub>, 200 μm) for 48 h. Cell viability was detected using MTT method (*n* = 4). (B) Apoptotic cells were analyzed using Hoechst staining and quantitated (*n* = 4). (C) RGCs were incubated with JC-1 probe at 37°C for 30 min, centrifuged, washed, transferred to a 96-well plate (100, 000 cells per well), and assayed using a fluorescence plate reader (*n* = 4).

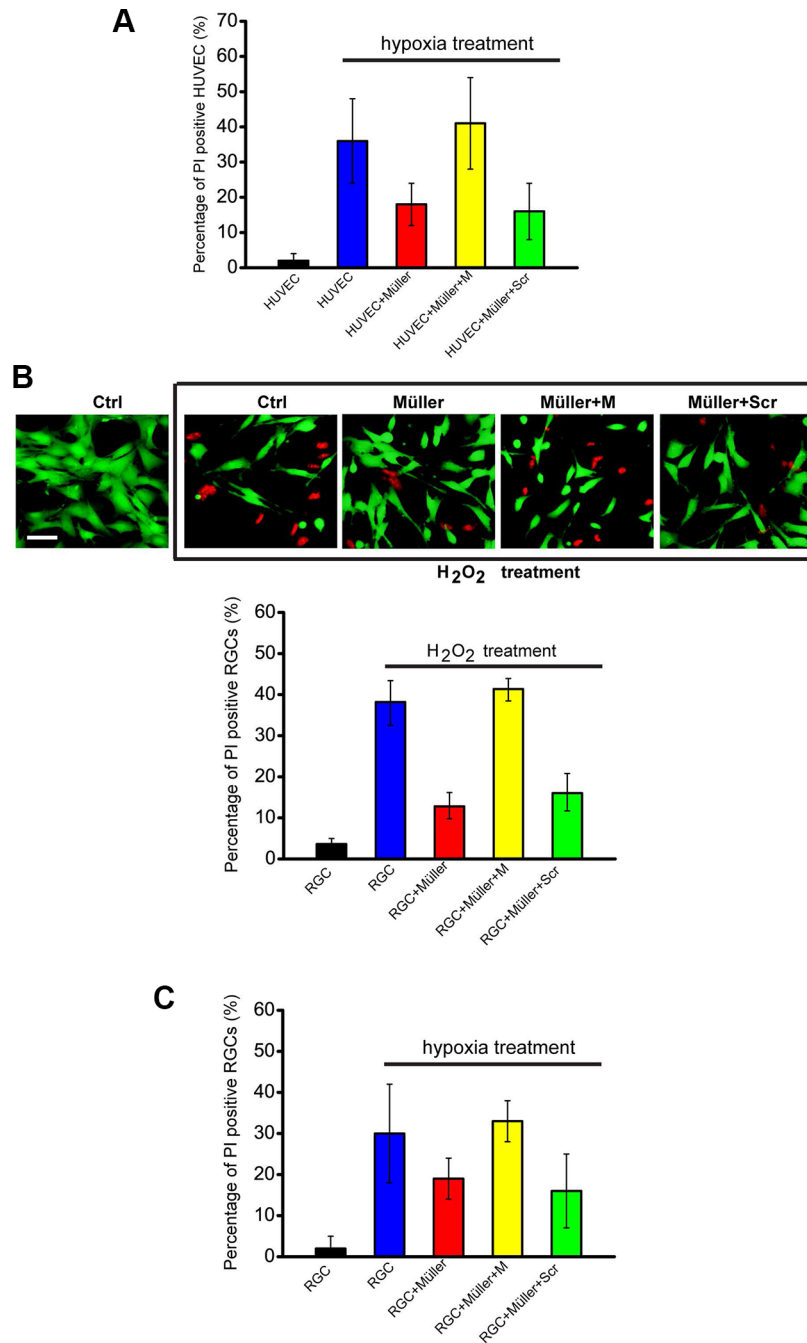

**Supplementary Figure S5: MIAT knockdown in Müller cells affects HUVEC and RGC function.** (A) HUVECs were co-cultured with Müller cells, and then treated with hypoxia (CoCl<sub>2</sub>, 200 μm) for 48 h. PI staining and quantitative analysis was conducted to detect the dead or dying cells (*n* = 4). (B, C) RGCs were co-cultured with Müller cells, and then treated with H<sub>2</sub>O<sub>2</sub> (50 μm, B) or hypoxia (CoCl<sub>2</sub>, 200 μm, C) for 48 h. PI staining and quantitative analysis was conducted to detect the dead or dying cells (*n* = 4). Scale bar, 20 μm.

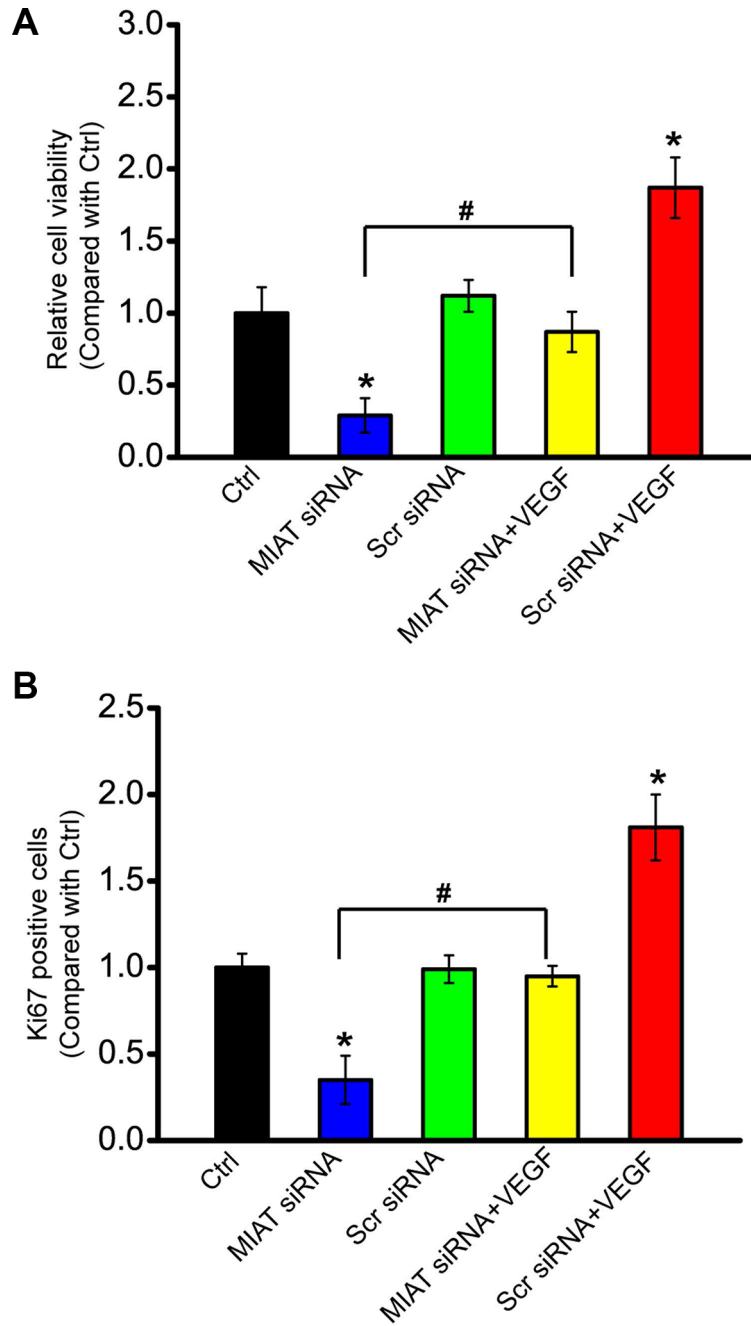

**Supplementary Figure S6: MIAT-miR-150-5p regulatory loop is critical for Müller cell function.** (A) MTT assay was performed to detect Müller cell viability. The data was expressed as relative change compared with the control group ( $n = 4$ ). (B) A representative image was shown for Ki67 staining of Müller cells along with the quantification of Ki67 positive cells upon different treatments. Scale bar, 20  $\mu\text{m}$ . “\*” indicated significant difference compared with the corresponding control group. “#” indicated significant difference between different experimental groups.



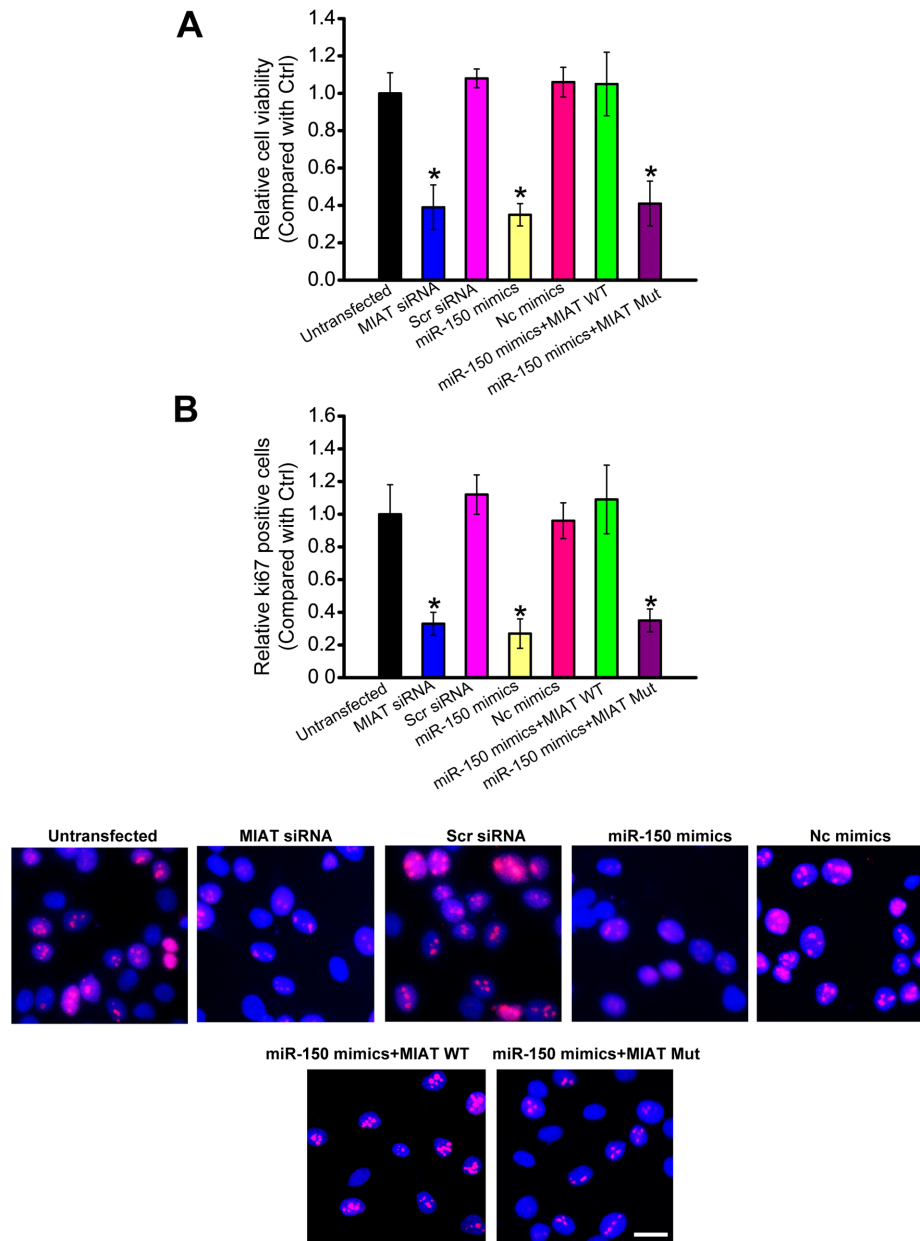

**Supplementary Figure S7: MIAT-VEGF crosstalk is involved in regulating Müller cell function.** (A, B) Müller cells were transfected with MIAT siRNA or scrambled siRNA, and then treated with or without VEGF (10 ng/ml) for 24 h. Cell viability was detected using MTT assay (A). Cell proliferation was detected using ki67 staining, and then quantified (B),  $n = 4$ ,  $*P < 0.05$ . “\*” indicated significant difference compared with the corresponding control group. “#” indicated significant difference between the marked groups.

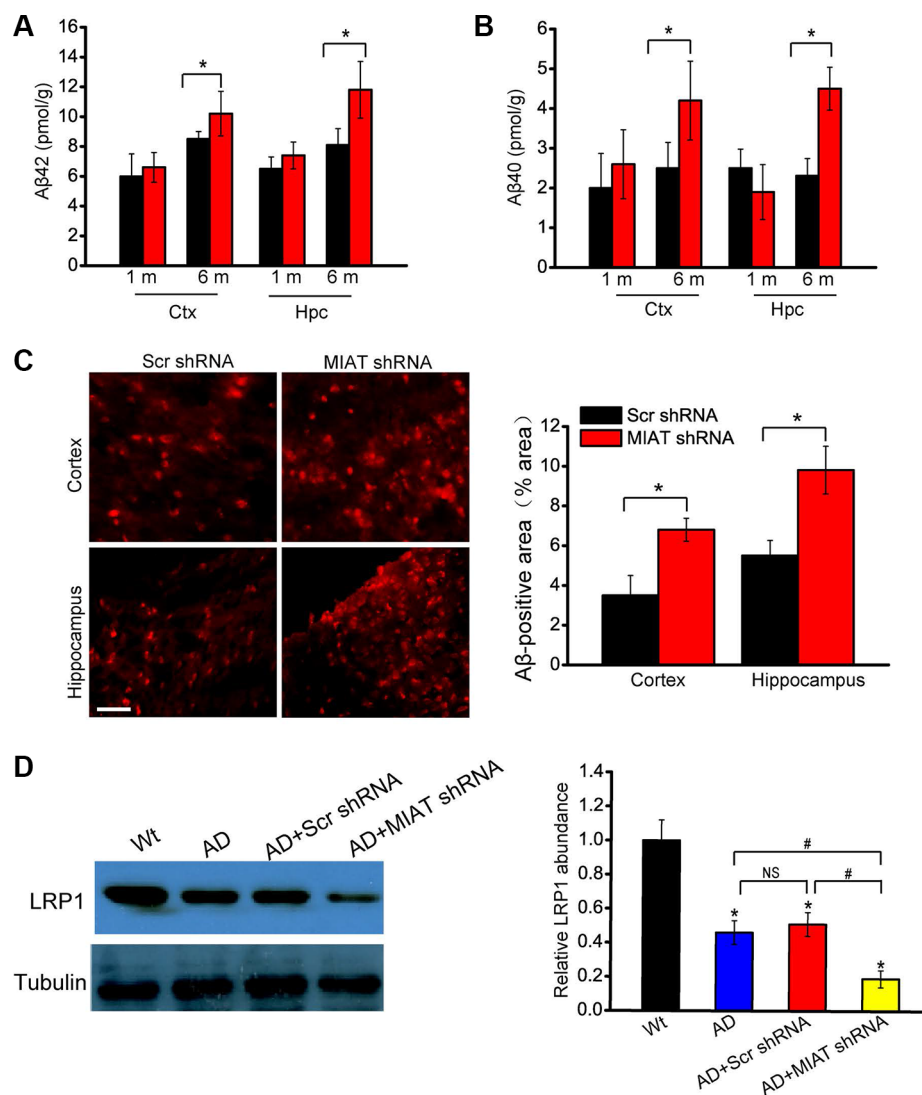

**Supplementary Figure S8: MIAT knockdown affects the progress of CNS  $\beta$ -amyloidosis.** (A, B) Cortical (Ctx) and hippocampal (Hpc) A $\beta$ 40 (A) and A $\beta$ 42 (B) levels were detected in 1-, and 12-month-old APP/PSN mice.  $n = 6$  mice per group;  $*P < 0.05$ . (C) A $\beta$ -immunodetection (red) and quantification in the somatosensory cortex and CA1 hippocampal subfield in MIAT knockdown mice and age-matched littermates. Scale bar, 200  $\mu$ m.  $n = 6$  mice per group;  $*P < 0.05$ . (D) Immunoblotting for LRP1 in isolated microvessels (top panel) and quantification (bottom panel) in 12-month-old MIAT knockdown mice and age-matched littermates.  $n = 6$  mice per group;  $*P < 0.05$ , NS, no significant difference.
